# Supplementary material for: Comparison of Clinical Outcomes of Two-Level PELD and Foraminoplasty PELD for Highly Migrated Disc Herniations: A Comparative Study
Source: Hindawi journal article supplement (doi:10.1155/2019/9681424), 2019-10-13
Supplement: f1 [file 9681424.f1.pdf]

**Supplementary Table 1: The levels of lesions in two-level PELD group and foraminoplasty PELD group.**

| Variables    | Two-level PELD (N=14) |      |       | Foraminoplasty PELD (N=26) |      |       |
|--------------|-----------------------|------|-------|----------------------------|------|-------|
|              | L3/4                  | L4/5 | L5/S1 | L3/4                       | L4/5 | L5/S1 |
| High-caudal  | 5                     | 4    | 0     | 4                          | 10   | 6     |
| High-cranial | 0                     | 3    | 2     | 0                          | 4    | 2     |
